# Supplementary material for: JAK1 Pseudokinase V666G Mutant Dominantly Impairs JAK3 Phosphorylation and IL-2 Signaling
Source: MDPI journal article supplement (doi:10.3390/ijms24076805), 2023-04-06
Supplement: s1 [file s1]

(a)

| GENE    | JAK1   |
|---------|--------|
| CONTROL | 0      |
| ALL     | 1      |
| PROVEAN | -6.846 |
| AA FROM | V      |
| RESIDUE | 666    |
| TO AA   | G      |
| DOMAIN  | JH2    |

(b)

| JAKs | * |   |   |   |   |   |   |
|------|---|---|---|---|---|---|---|
| JAK1 | N | I | M | V | E | E | F |
| JAK2 | N | I | L | V | Q | E | F |
| JAK3 | T | - | M | V | Q | E | F |
| TYK2 | N | I | M | V | T | E | Y |

  

| SPECIES     | * |   |   |   |   |   |   |
|-------------|---|---|---|---|---|---|---|
| HUMAN       | N | I | M | V | E | E | F |
| MOUSE       | N | I | M | V | E | E | F |
| ZEBRAFISH   | N | I | M | V | E | E | F |
| RAT         | N | I | M | V | E | E | F |
| CHIMP       | N | I | M | V | E | E | F |
| CARP        | N | I | M | V | E | E | F |
| COW         | N | I | M | V | E | E | F |
| DOG         | N | I | M | V | E | E | F |
| CHICKEN     | N | I | M | V | E | E | F |
| CHAMELEON   | N | I | M | V | E | E | F |
| FROG        | N | I | M | V | E | E | F |
| PUFFER-FISH | N | I | M | V | E | E | F |

**Figure S1.** JAK1 V666G mutation in P1 pre-T ALL-patient sample. (a) P1 contained an unreported JAK1 pseudokinase (JH2) valine (V) 666-to-glycine (G) heterozygous mutation, which had a PROVEAN score of -6.846, and a variant allele frequency (VAF) score at 20%. (b) JAK1 V666 (indicated by \*) is conserved amongst JAK family members and across various species. -3 amino acids and +3 amino acids surrounding V666 are shown.

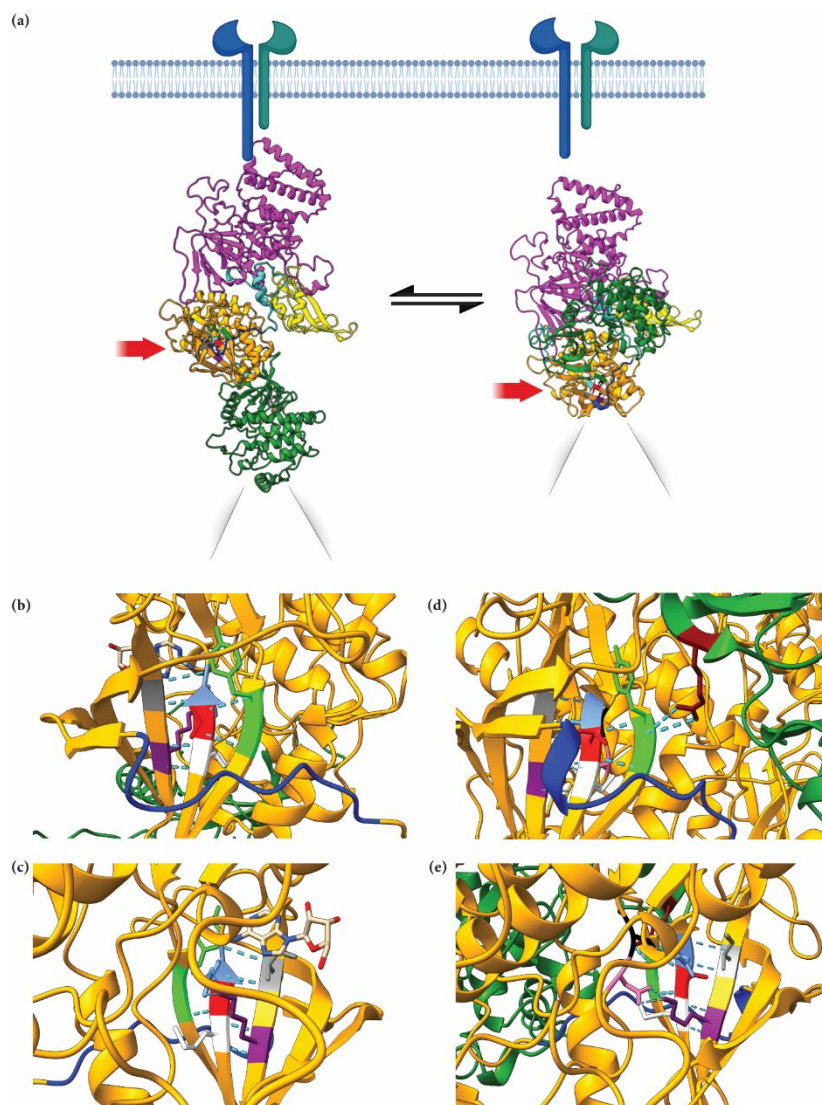

**Figure S2.** Structural implications of JAK1 V666 modeled in open and closed enzymatic configurations. (a) The N-terminal 4.1 protein, ezrin, radixin, moesin domain (FERM, pink), Src homology domain (SH2, yellow), pseudokinase (orange), and C-terminal kinase domain (green) are depicted within the open-kinase (left side) and closed-kinase form (right side). V666 (red) is depicted within the pseudokinase domain. Figure was created with BioRender.com (b) Front view of the open-kinase structure. Identical to depiction in Figure 6b. (c) Back view of the open-kinase structure. Anterior JH2 loop (orange) was deleted to enable a clear view of H-bonds depicted in Figure 6c. (d) Front view of the closed-kinase structure. Identical to depiction in Figure 6d. (e) Back view of the closed-kinase structure. Anterior JH2 loop (orange) was deleted to enable a clear view of H-bonds depicted in Figure 6e.
